# Supplementary material for: Pectin–Zeolite-Based Wound Dressings with Controlled Albumin Release
Source: MDPI journal article supplement (doi:10.3390/polym14030460), 2022-01-24
Supplement: s1 [file s1]

## Supplementary Material

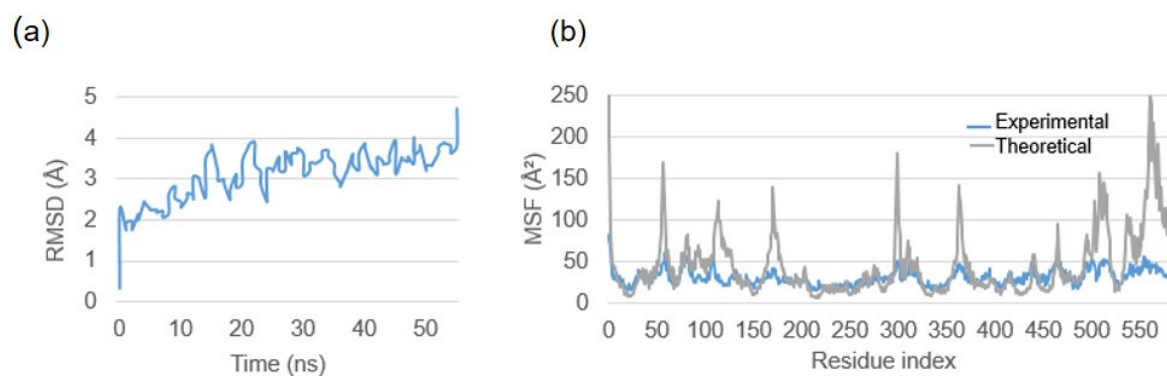

**Figure S1.** (a) Root mean squared deviation and (b) Mean squared fluctuations of human serum albumin with molecular dynamics simulations.
